# Supplementary material for: Comparison of whole genome amplification techniques for human single cell exome sequencing
Source: PLOS journal article supplement (doi:10.1371/journal.pone.0171566), 2017-02-16
Supplement: S8 (10.1371/journal.pone.0171566.s008) [file journal.pone.0171566.s008]

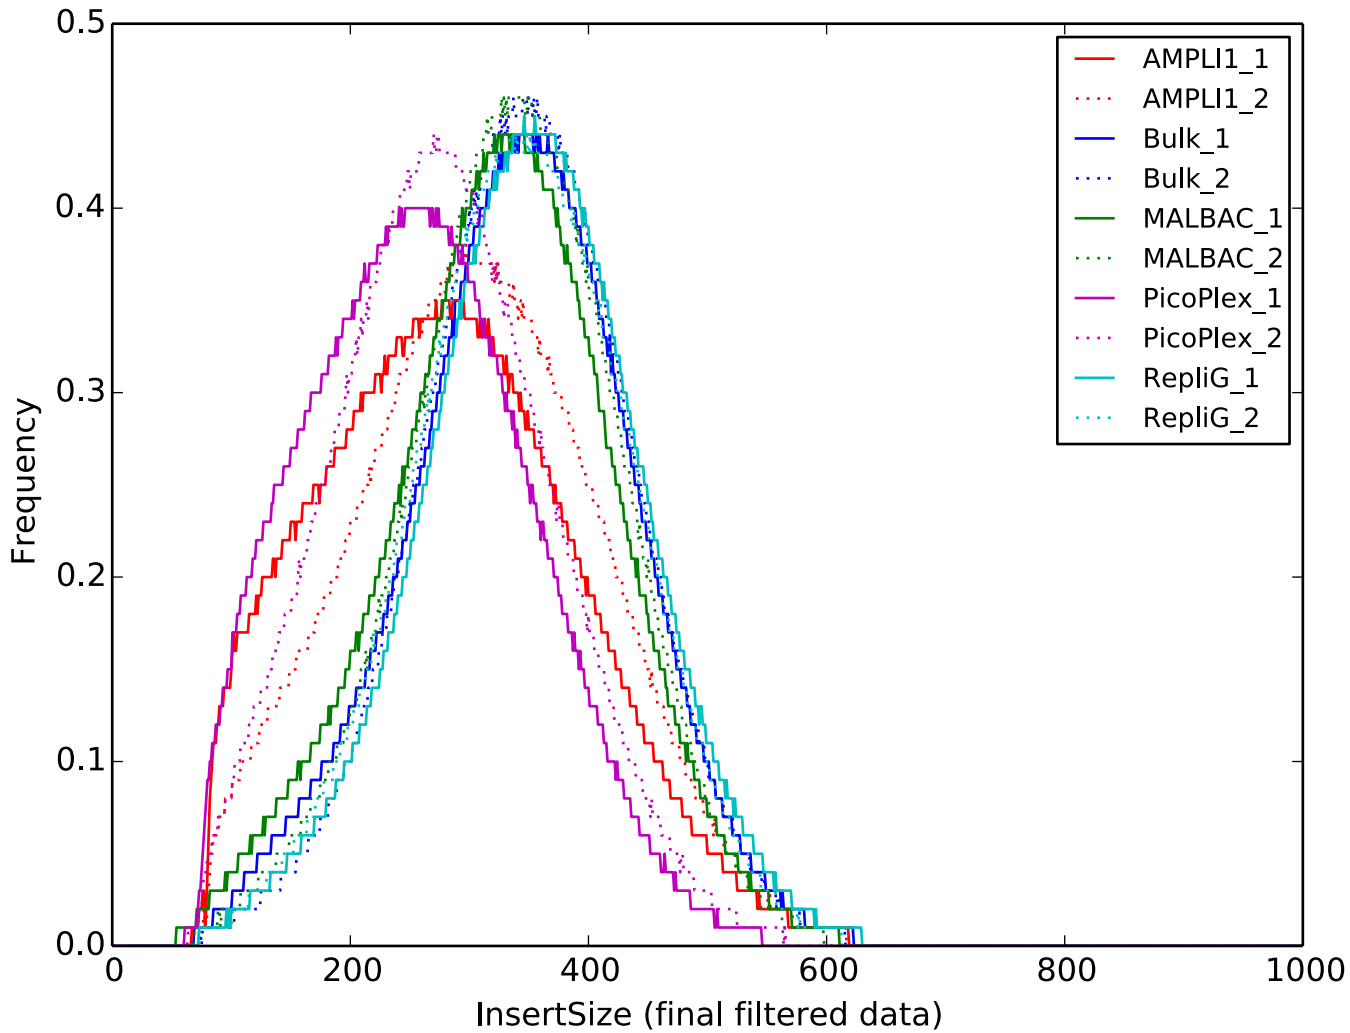

**Supplementary Figure 8.**  
Insert sizes of mapped and filtered read pairs in the 10 Million subset.
