# Supplementary material for: Comparison of whole genome amplification techniques for human single cell exome sequencing
Source: PLOS journal article supplement (doi:10.1371/journal.pone.0171566), 2017-02-16
Supplement: S9 (10.1371/journal.pone.0171566.s009) [file journal.pone.0171566.s009]

| Sample ID  | All data              |              |                 |                |                |
|------------|-----------------------|--------------|-----------------|----------------|----------------|
|            | Number of read pairs  | Mapping Rate | Reads on target | PCR Duplicates | Exome coverage |
| Bulk_1     | 21 365 022            | 99,26%       | 84,37%          | 20,59%         | 93,16%         |
| Bulk_2     | 21 259 830            | 99,40%       | 85,92%          | 14,58%         | 92,21%         |
| AMPLI1_1   | 10 605 140            | 92,84%       | 46,37%          | 24,59%         | 50,79%         |
| AMPLI1_2   | 18 964 828            | 95,12%       | 52,51%          | 29,82%         | 55,21%         |
| MALBAC_1   | 28 883 280            | 99,10%       | 77,30%          | 21,24%         | 68,00%         |
| MALBAC_2   | 22 933 845            | 99,35%       | 85,47%          | 19,78%         | 59,37%         |
| RepliG_1   | 20 594 112            | 99,10%       | 53,48%          | 23,81%         | 12,16%         |
| RepliG_2   | 16 160 598            | 99,34%       | 61,88%          | 17,93%         | 21,38%         |
| PicoPlex_1 | 10 617 288            | 94,54%       | 82,64%          | 17,48%         | 35,38%         |
| PicoPlex_2 | 10 062 223            | 91,75%       | 83,54%          | 21,67%         | 6,95%          |
| Sample ID  | 10M read pairs subset |              |                 |                |                |
|            | Number of read pairs  | Mapping Rate | Reads on target | PCR Duplicates | Exome coverage |
| Bulk_1     | 10 000 000            | 99,26%       | 84,40%          | 10,94%         | 91,35%         |
| Bulk_2     | 10 000 000            | 99,40%       | 85,88%          | 7,42%          | 90,26%         |
| AMPLI1_1   | 10 000 000            | 92,84%       | 46,48%          | 23,74%         | 50,34%         |
| AMPLI1_2   | 10 000 000            | 95,13%       | 54,17%          | 20,90%         | 49,75%         |
| MALBAC_1   | 10 000 000            | 99,10%       | 77,92%          | 8,93%          | 59,59%         |
| MALBAC_2   | 10 000 000            | 99,35%       | 85,59%          | 9,83%          | 53,53%         |
| RepliG_1   | 10 000 000            | 99,10%       | 53,53%          | 13,80%         | 10,13%         |
| RepliG_2   | 10 000 000            | 99,34%       | 61,89%          | 12,02%         | 19,55%         |
| PicoPlex_1 | 10 000 000            | 94,54%       | 82,51%          | 16,69%         | 35,09%         |
| PicoPlex_2 | 10 000 000            | 91,75%       | 83,50%          | 21,58%         | 6,96%          |

### Supplementary Table 1.

Amount of data obtained, mapping rates, percentage of reads that map to target regions, rate of PCR duplicates and percentage of the exome covered for each sample in the full data set and the 10M read pair subset. Despite identical amounts of initial material, the output data differed significantly. The target coverage was much lower for the amplified single cells (range between 7 and 68%) compared to the 90% coverage of the bulk.
